# Supplementary material
Source: PubMed Central journal article supplement (PMC4066482)
Supplement: 1406478111_pnas.201406478SI.pdf [file 1406478111_pnas.201406478SI.pdf]

# Supporting Information

Dalia et al. 10.1073/pnas.1406478111

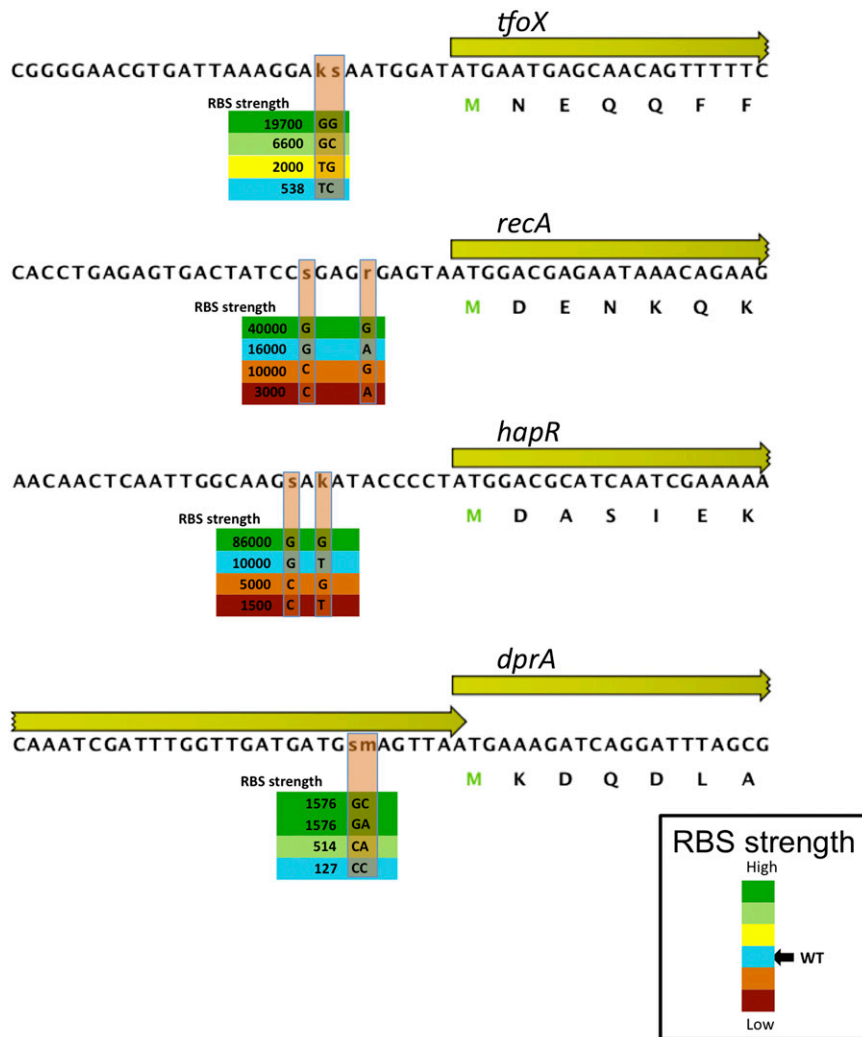

**Fig. S1.** The design for ribosome-binding site (RBS) optimization at *tfoX*, *recA*, *hapR*, and *dprA* showing the bases that were randomized. RBS strengths shown are from the ribosome binding site calculator (1) and are based on an arbitrary scale from 0–100,000.

1. Salis HM (2011) The ribosome binding site calculator. *Methods Enzymol* 498:19–42.

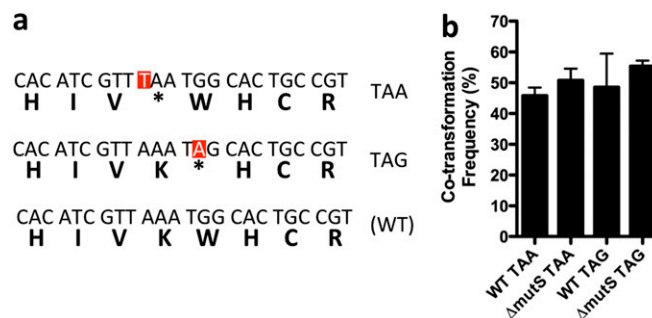

**Fig. S2.** Lack of mismatch repair (MMR) activity during natural competence of *Vibrio cholerae* on chitin. (A) Design of transversion (TAA) and transition (TAG) mutations in *lacZ*, which result in premature stop codons. Transition mutations are repaired by MMR more efficiently than are transversion mutations. (B) Cotransformation frequency for these mutations in WT and the MMR-deficient *mutS* deletion strain, demonstrating MMR has that little to no effect on co-transformation in *V. cholerae*. Data are from two biological replicates and are shown as the mean  $\pm$  SD.

**Table S1.** Parent strains used in this study

| Strain name in article                                                                           | Genotype and antibiotic resistance(s)                            | Description                                                                                                                                                                                                                                                                                |
|--------------------------------------------------------------------------------------------------|------------------------------------------------------------------|--------------------------------------------------------------------------------------------------------------------------------------------------------------------------------------------------------------------------------------------------------------------------------------------|
| WT <i>V. cholerae</i>                                                                            | E7946 Sm <sup>R</sup>                                            | Sm <sup>R</sup> derivative of WT <i>V. cholerae</i> O1 El Tor (1), which was used to optimize cotransformation in <i>V. cholerae</i> .                                                                                                                                                     |
| Parent strain for <i>V. cholerae</i> multiplex genome editing by natural transformation (MuGENT) | E7946 SmR ΔVC1807 <i>lacI<sup>q</sup>::lacZ</i> Kan <sup>R</sup> | Contains <i>lacI<sup>q</sup></i> in the <i>lacZ</i> gene, which regulates the P <sub>tac</sub> promoter used in MuGENT for natural transformation in <i>V. cholerae</i> . Generated by cotransformation with a selected product that replaces VC1807 with the kanamycin-resistance marker. |
| Δ <i>mutS</i> <i>V. cholerae</i>                                                                 | E7946 SmR ΔVC0535 ( <i>mutS</i> ) Spec <sup>R</sup>              | <i>mutS</i> gene replaced by Spec <sup>R</sup> marker, used to study the effect of MMR on cotransformation in <i>V. cholerae</i> .                                                                                                                                                         |
| WT <i>Streptococcus pneumoniae</i>                                                               | TIGR4                                                            | WT virulent serotype 4 pneumococcal isolate (2), used for pneumococcal histidine triad ( <i>pht</i> ) MuGENT                                                                                                                                                                               |
| MMR-deficient <i>S. pneumoniae</i>                                                               | TIGR4 Sm <sup>R</sup> magellan2::SP_2076 ( <i>hexA</i> )         | Mariner transposon insertion in <i>hexA</i> , a critical component of MMR in <i>S. pneumoniae</i> (3), used for <i>pht</i> MuGENT in an MMR-deficient strain                                                                                                                               |

Kan<sup>R</sup>, kanamycin-resistance marker; Sm<sup>R</sup>, streptomycin resistance; Spec<sup>R</sup>, spectinomycin-resistance marker.

- Levine MM, et al. (1982) The pathogenicity of nonenterotoxigenic *Vibrio cholerae* serogroup O1 biotype El Tor isolated from sewage water in Brazil. *J Infect Dis* 145(3):296–299.
- Tettelin H, et al. (2001) Complete genome sequence of a virulent isolate of *Streptococcus pneumoniae*. *Science* 293(5529):498–506.
- Hava DL, Camilli A (2002) Large-scale identification of serotype 4 *Streptococcus pneumoniae* virulence factors. *Mol Microbiol* 45(5):1389–1406.

Table S2. Primers used in this study

| Primer name                     | Sequence (5' → 3')                                            | Description                                                                                                                                                    |
|---------------------------------|---------------------------------------------------------------|----------------------------------------------------------------------------------------------------------------------------------------------------------------|
| <b>Mutant construct primers</b> |                                                               |                                                                                                                                                                |
| ABD346                          | GTAGAATAAGTGGCGGTGAGCC                                        | F1 oligo for 3 kb UP arm $\Delta$ VC1807 SOE                                                                                                                   |
| ABD344                          | GATTAGCAACGATTCTAGCGCAGGAG                                    | F1 oligo for 2-kb UP arm $\Delta$ VC1807 SOE                                                                                                                   |
| ABD342                          | ATTTTTCAGTTGGCCTACAATGCTTTCC                                  | F1 oligo for 1-kb UP arm $\Delta$ VC1807 SOE                                                                                                                   |
| ABD340                          | gtcgacggatccccgggaatACGTTTCATTAGTCACCTCTATT-GTTAACTTGTTCC     | R1 oligo for UP arm $\Delta$ VC1807 SOE                                                                                                                        |
| ABD341                          | gaagcagctccagcctacaTAGTCGAAAAATAAAAAAAGAGG-CTCGCCTC           | F2 oligo for DOWN arm $\Delta$ VC1807 SOE                                                                                                                      |
| ABD343                          | CGATGAGGATAAAAAACAGTACAGGCC                                   | R2 oligo for 1-kb DOWN arm $\Delta$ VC1807 SOE                                                                                                                 |
| ABD345                          | CTTGCTAACCGTTGGTGTACCAGC                                      | R2 oligo for 2-kb DOWN arm $\Delta$ VC1807 SOE                                                                                                                 |
| ABD347                          | GCGCCCAATGTGTCCCTTTGATG                                       | R2 oligo for 3-kb DOWN arm $\Delta$ VC1807 SOE                                                                                                                 |
| ABD123                          | ATCCGGGGATCCGTCGAC                                            | F oligo for Kan <sup>R</sup> , Amp <sup>R</sup> , and Spec <sup>R</sup> markers in <i>V. cholerae</i>                                                          |
| ABD124                          | TGTAGGCTGGAGCTGCTTC                                           | R oligo for Kan <sup>R</sup> , Amp <sup>R</sup> , and Spec <sup>R</sup> markers in <i>V. cholerae</i>                                                          |
| ABD357                          | GCGCTGCCAAGTAGGTGTAACG                                        | F1 oligo for UP arm of $\Delta$ mutS SOE for <i>V. cholerae</i>                                                                                                |
| ABD358                          | gtcgacggatccccgggaatCATAATCTTATGTCGCTGCTTAT-CATCATCTG         | R1 oligo for UP arm of $\Delta$ mutS SOE for <i>V. cholerae</i>                                                                                                |
| ABD359                          | gaagcagctccagcctacaTAGTTATTGCCATATCTCAAGC-ATGGAATC            | F2 oligo for UP arm of $\Delta$ mutS SOE for <i>V. cholerae</i>                                                                                                |
| ABD360                          | AGATCTTGCCCTGATGACGCTTTACTC                                   | R2 oligo for UP arm of $\Delta$ mutS SOE for <i>V. cholerae</i>                                                                                                |
| ABD336                          | ACCCTAAGCGGTTCAATTTTGTGCGATG                                  | F1 oligo for 3 kb <i>lacZ</i> UP arm                                                                                                                           |
| ABD334                          | AGTGCTCCGGACTCTTTGCTCTG                                       | F1 oligo for 2 kb <i>lacZ</i> UP arm                                                                                                                           |
| ABD332                          | GGCTGAACGTGGTGTGCGAAAAATGAC                                   | F1 oligo for 1 kb <i>lacZ</i> UP arm                                                                                                                           |
| ABD333                          | ATCACATGCCCAATTTCGGGATG                                       | R2 oligo for 1 kb <i>lacZ</i> DOWN arm                                                                                                                         |
| ABD335                          | CACTGCTCACTAGCGATGCAGTG                                       | R2 oligo for 2 kb <i>lacZ</i> DOWN arm                                                                                                                         |
| ABD337                          | TGATCCGATGATCTTTTCGCCACC                                      | R2 oligo for 3 kb <i>lacZ</i> DOWN arm                                                                                                                         |
| ABD329                          | GAACATGGGGTGTACGGCAGTGCCATTaAACGATGTGCGGGT-TTTGCCAATCTTG      | R1 oligo for <i>lacZ</i> TAA transversion mutation                                                                                                             |
| ABD328                          | CAAGATTGGCAAAACCCGCACATCGTTtAATGGCACTGCCGT-ACACCCCATGTTT      | F2 oligo for <i>lacZ</i> TAA transversion mutation                                                                                                             |
| ABD331                          | GAACATGGGGTGTACGGCAGTGCTATTTAACGATGTGCGGGT-TTTGCCAATCTTG      | R1 oligo for <i>lacZ</i> TAG transversion mutation                                                                                                             |
| ABD330                          | CAAGATTGGCAAAACCCGCACATCGTTAAATaGCACTGCCGT-ACACCCCATGTTT      | F2 oligo for <i>lacZ</i> TAG transversion mutation                                                                                                             |
| ABD361                          | CCTCtctccctatagtgagtcgtattaatttcATTTAACGAT-GTGGGGTTTTGCCAATC  | R1 oligo for $\Delta$ 50, $\Delta$ 100, $\Delta$ 464, and $\Delta$ 1166 bp in <i>lacZ</i>                                                                      |
| ABD362                          | CGTTAAATgaaattaatacagactcactataggagaGAGGCT-CGTTTGGATGTTGGG    | F2 oligo for $\Delta$ 50 bp in <i>lacZ</i>                                                                                                                     |
| ABD363                          | CGTTAAATgaaattaatacagactcactataggagaGaGGTT-TGCTCTGTTGAGAAGCC  | F2 oligo for $\Delta$ 100 bp in <i>lacZ</i>                                                                                                                    |
| ABD364                          | ATCGTTAAATgaaattaatacagactcactataggagaGAGG-GTGA AACCTGTTGGTGG | F2 oligo for $\Delta$ 464 bp in <i>lacZ</i>                                                                                                                    |
| ABD365                          | CATCGTTAAATgaaattaatacagactcactataggagaGAG-GCCAATCTCGAAACCCAC | F2 oligo for $\Delta$ 1166 bp in <i>lacZ</i>                                                                                                                   |
| ABD288                          | GCCAATCGTGGAGTCGACCC                                          | F1 oligo for a transversion point mutation upstream of VCA0063 that abolishes an MboI cleavage site                                                            |
| ABD069                          | AAATAAaATCAATTATCATTGTGTTATTTTAGAGC                           | R1 oligo for a transversion point mutation upstream of VCA0063 that abolishes an MboI cleavage site                                                            |
| ABD068                          | AAATGATAATTGATtTTATTTAGATTGTGTTAGAGTGGCGAC                    | F2 oligo for a transversion point mutation upstream of VCA0063 that abolishes an MboI cleavage site                                                            |
| ABD289                          | CGTCACCTGAAGATCCATCCGTC                                       | R2 oligo for a transversion point mutation upstream of VCA0063 that abolishes an MboI cleavage site                                                            |
| ABD841                          | GGCACTGCCGTACACCCCATGTTCCGGTACCCGACCCATCG-AATG                | F oligo to amplify <i>lacI<sup>f</sup></i> with overlaps to insert into the <i>lacZ</i> gene of <i>V. cholerae</i> .                                           |
| ABD842                          | GGCTCTCTGGCTTATTGTGGGGGAAACCTGCTGCCAGCTGG                     | R oligo to amplify <i>lacI<sup>f</sup></i> with overlaps to insert into the <i>lacZ</i> gene of <i>V. cholerae</i> .                                           |
| ABD840                          | TTAATTGCGTTGCGCTCACTGCCGACTCCCGTTCTGGATAA-TGTTTTTTGC          | F oligo for P <sub>tac</sub> and <i>rrnB</i> promoter construct (i.e., the MIDDLE for the MuGENT PCR products of <i>tfoX</i> , <i>hapR</i> , and <i>recA</i> ) |
| ABD625                          | CTGATGAATCCCCTAATGATTTTGG                                     | R oligo for P <sub>tac</sub> and <i>rrnB</i> promoter construct (i.e., the MIDDLE for the MuGENT PCR products of <i>tfoX</i> , <i>hapR</i> , and <i>recA</i> ) |
| ABD808                          | GTGTGGCTTGTGCGTCCGGCAAAGG                                     | F1 oligo for UP arm of <i>tfoX</i> MuGENT SOE product                                                                                                          |
| ABD809                          | CGGGCAGTGAGCGCAACGCAATTAATGCAATACTTTTGGCG-CAGATTATG           | R1 oligo for UP arm of <i>tfoX</i> MuGENT SOE product                                                                                                          |

Table S2. Cont.

| Primer name | Sequence (5' → 3')                                             | Description                                               |
|-------------|----------------------------------------------------------------|-----------------------------------------------------------|
| ABD810      | CAAAATCATTAGGGGATTCATCAGGGGAACGTGATTAAGG-AksAATGGATATGAATG     | F2 oligo for DOWN arm of <i>tfoX</i> MuGENT SOE product   |
| ABD811      | GTTAGAAGAGCTTATCCATCACCG                                       | R2 oligo for DOWN arm of <i>tfoX</i> MuGENT SOE product   |
| ABD812      | AAATGGAGTTTGATCGCATTGGC                                        | F1 oligo for UP arm of <i>recA</i> MuGENT SOE product     |
| ABD813      | CGGGCAGTGAGCGCAACGCAATTAACCCCTGTATAGAAAAA-GTTTGGC              | R1 oligo for UP arm of <i>recA</i> MuGENT SOE product     |
| ABD814      | CAAAATCATTAGGGGATTCATCAGGTGACTATCCSGAGRGAG-TAATGGACGAGAATAAAC  | F2 oligo for DOWN arm of <i>recA</i> MuGENT SOE product   |
| ABD815      | TGATCAGCGTTTGGAAATACGTCG                                       | R2 oligo for DOWN arm of <i>recA</i> MuGENT SOE product   |
| ABD816      | AAAGCACCAAATAATCCCGCGACC                                       | F1 oligo for UP arm of <i>hapR</i> MuGENT SOE product     |
| ABD817      | CGGGCAGTGAGCGCAACGCAATTAACCTGTGGTGAAAAA-TGTGC                  | R1 oligo for UP arm of <i>hapR</i> MuGENT SOE product     |
| ABD818      | CAAAATCATTAGGGGATTCATCAGATTGGCAAGSAKATACCC-CTATGGACGCATCAATCG  | F2 oligo for DOWN arm of <i>hapR</i> MuGENT SOE product   |
| ABD819      | GGCCTGCTTAGCAAATTTACCAG                                        | R2 oligo for DOWN arm of <i>hapR</i> MuGENT SOE product   |
| ABD820      | CGCTCTTATCTGCTTGGATAATGG                                       | F1 oligo for UP arm of <i>dprA</i> MuGENT SOE product     |
| ABD821      | GCCGCTAAATCCTGATCTTTCATTAACKSCATCATCAACCA-AATCGATTTGTTC        | R1 oligo for UP arm of <i>dprA</i> MuGENT SOE product     |
| ABD822      | AGTTAATGAAAGATCAGGATTTAGCGGC                                   | F2 oligo for DOWN arm of <i>dprA</i> MuGENT SOE product   |
| ABD823      | TGAAGTACAAGGCCAGTTACTGG                                        | R2 oligo for DOWN arm of <i>dprA</i> MuGENT SOE product   |
| ABD824      | TTTAGCCCCATTGGCGAAGTGGG                                        | F1 oligo for UP arm of <i>mutS</i> MuGENT SOE product     |
| ABD825      | GAGTATCTTTGACGTATTGGATCtcatattataactacATAAT-CTTATGTCGCTGCTTATC | R1 oligo for UP arm of <i>mutS</i> MuGENT SOE product     |
| ABD826      | GATAAGCAGCGACATAAGATTATGtagtataaatatgaGATCC-AATACGTCAAAGATACTC | F2 oligo for DOWN arm of <i>mutS</i> MuGENT SOE product   |
| ABD360      | AGATCTTGCCTGATGACGCTTTACTC                                     | R2 oligo for DOWN arm of <i>mutS</i> MuGENT SOE product   |
| Spn cat F   | CGGTATCGATAAGCCTTGATG                                          | F oligo for SpecR and CmR markers in <i>S. pneumoniae</i> |
| Spn cat R   | TGGAGCTGTAATATAAAAAACCTTCTTC                                   | R oligo for SpecR and CmR markers in <i>S. pneumoniae</i> |
| ABD528      | GGAGAACTTAATGAATTTAGAGGACATG                                   | F1 oligo for UP arm of $\Delta$ SP_1051 SOE               |
| 1051_R1     | CATCAAGCTTATCGATACCGTTCATTAGGCCACCATC                          | R1 oligo for UP arm of $\Delta$ SP_1051 SPE               |
| 1051_F2     | GAAGAAGGTTTTTATATTACAGCTCCAGGGGAAAAGAGACT-TAATG                | F2 oligo for DOWN arm of $\Delta$ SP_1051 SOE             |
| ABD529      | CTATGTGTTTCAGCTGACTCCCATG                                      | R2 oligo for DOWN arm of $\Delta$ SP_1051 SOE             |
| ABD534      | AAAAGTGCACGACAAATAGCCC                                         | F1 oligo for <i>phtD</i> inactivation MuGENT SOE product  |
| ABD535      | GACAATGTCTGAATCCTaCAACTGcTAATTCGGATCTTTCAT-GAGGAGC             | R1 oligo for <i>phtD</i> inactivation MuGENT SOE product  |
| ABD536      | GCTCCTCATGAAAGATCCGAATTAgCAGTTgTAGGATTCAGACATTGTC              | F2 oligo for <i>phtD</i> inactivation MuGENT SOE product  |
| ABD539      | GACAATATCAGCGTCTTaAAGTTGcTAGTTTGGATCCTTCAT-CAAGAGTTCTTCAC      | R2 oligo for <i>phtD</i> inactivation MuGENT SOE product  |
| ABD536      | GCTCCTCATGAAAGATCCGAATTAgCAGTTgTAGGATTCAGACATTGTC              | F1 oligo for <i>phtE</i> inactivation MuGENT SOE product  |
| ABD539      | GACAATATCAGCGTCTTaAAGTTGcTAGTTTGGATCCTTCAT-CAAGAGTTCTTCAC      | R1 oligo for <i>phtE</i> inactivation MuGENT SOE product  |
| ABD540      | GTGAAGAACTCTTGATGAAGGATCCAAACTAgCAACTTtAAG-ACCGTGATATTGTC      | F2 oligo for <i>phtE</i> inactivation MuGENT SOE product  |
| ABD541      | AAAGGATAACAACAGATCCAGCTGC                                      | R2 oligo for <i>phtE</i> inactivation MuGENT SOE product  |
| ABD548      | GTTAATGAGGTCAAGGGTGGATAgGTTATCtAGGTAGATGGA-AAATACTATG          | F1 oligo for <i>phtE</i> inactivation MuGENT SOE product  |
| ABD543      | GACAATGTCTGAATCCTaCAACTGcTAATTCGGATCTTTCAT-GAGGAGC             | R1 oligo for <i>phtE</i> inactivation MuGENT SOE product  |
| ABD544      | GCTCCTCATGAAAGATCCGAATTAgCAGTTgTAGGATTCAGACATTGTC              | F2 oligo for <i>phtE</i> inactivation MuGENT SOE product  |
| ABD545      | TGCATAAAGCAATCCCTTTCTGATTT                                     | R2 oligo for <i>phtE</i> inactivation MuGENT SOE product  |
| ABD546      | GAGACATTATTACTGTCCAAGAAACGC                                    | F1 oligo for <i>phtE</i> inactivation MuGENT SOE product  |
| ABD547      | CATAGTATTTCCATCTACCTaGATAACcTATCCACCCTTGA-CCTCATTAAC           | R1 oligo for <i>phtE</i> inactivation MuGENT SOE product  |
| ABD548      | GTTAATGAGGTCAAGGGTGGATAgGTTATCtAGGTAGATGGA-AAATACTATG          | F2 oligo for <i>phtE</i> inactivation MuGENT SOE product  |
| ABD543      | GACAATGTCTGAATCCTaCAACTGcTAATTCGGATCTTTCAT-GAGGAGC             | R2 oligo for <i>phtE</i> inactivation MuGENT SOE product  |
